# Supplementary material for: A design approach to eliminate the toxic effect of insecticides to ensure human safety
Source: Royal Society of Chemistry journal article supplement (doi:10.1039/d1gc04636e), 2022-01-01
Supplement: d1gc04636e1.pdf [file d1gc04636e1.pdf]

## Supporting Information

# A Design Approach to Eliminate the Toxic Effect of Insecticides for Ensuring Human Safety

Bin He <sup>a</sup>, Pengbing Chang <sup>a</sup>, Sufeng Zhang <sup>a,\*</sup>, Xing Zhu <sup>a,b,c,\*</sup>

<sup>a</sup> *College of Bioresources Chemical and Materials Engineering, Shaanxi University of Science & Technology, Xi'an, 710021, Shaanxi, China*

<sup>b</sup> *The Youth Innovation Team of Shaanxi Universities, Xi'an 710021, Shaanxi, China*

<sup>c</sup> *Institute of Biomass & Functional Materials, Xi'an, 710021, Shaanxi, China*

*\* Corresponding authors at: College of Bioresources Chemical and Materials Engineering, Shaanxi University of Science & Technology, Xi'an, 710021, Shaanxi, China.*

*E-mail addresses: zhuxing@sust.edu.cn (X. Zhu),*

*Zhangsufeng@sust.edu.cn (S. Zhang).*

The document consists of 8 pages, 16 sections Supporting Information and 3 references.

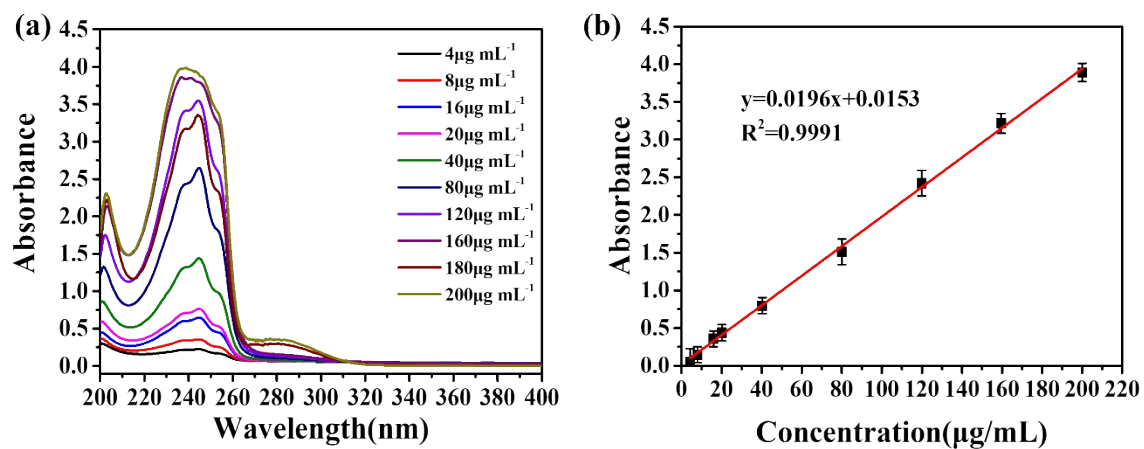

Figure.S1.Ultraviolet absorption spectrum (a) and standard curve (b) of AVM.

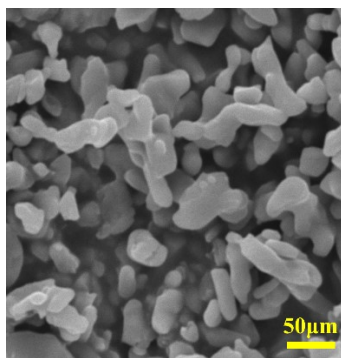

Figure S2. SEM image of RCM-PEGDA microspheres.

### S1 Cost assessment of the microspheres

Table S1 The cost of the raw materials

| Materials   | Cellulose | PEGDA | NaOH | Urea | TX-Ct | Others |
|-------------|-----------|-------|------|------|-------|--------|
| Cost(\$/kg) | 3.17      | 2.06  | 0.4  | 0.17 | 6.34  | 0.1    |

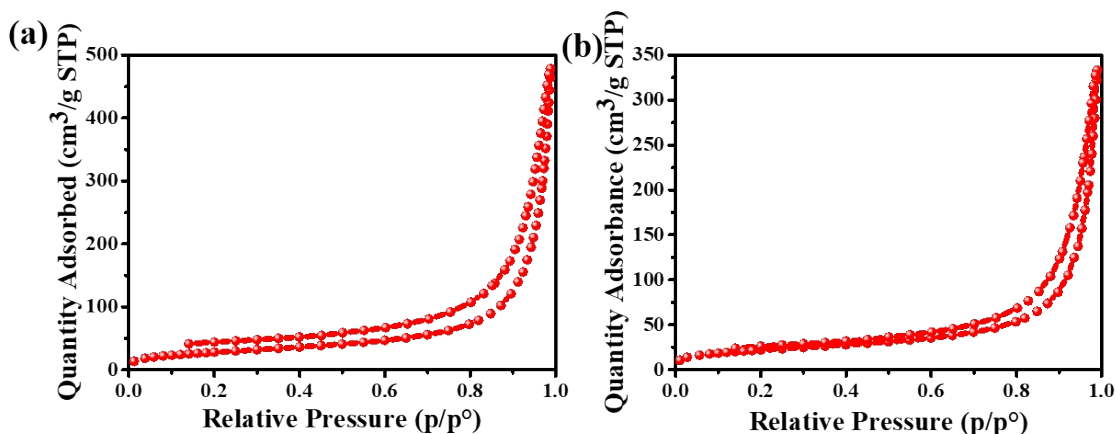

Figure.S3. N<sub>2</sub> adsorption-desorption isotherms of RCM (a) and RCM-PEGDA (b).

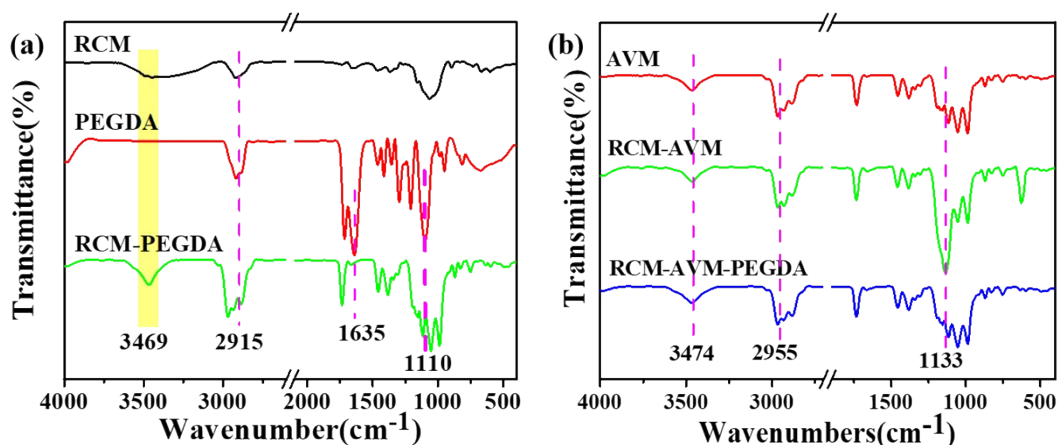

Figure.S4. FT-IR spectra of RCM, PEGDA and RCM-PEGDA (a), FT-IR spectra of AVM, RCM-AVM and RCM-AVM-PEGDA (b).

### S5 DI-loaded experiments

The insecticide-loaded regenerated cellulose gel microspheres (RCM-DI-PEGDA) was prepared under the same conditions as described above, except that DI was added. The RCM was loaded with DI through a simple solvent adsorption method. First, 10 mg of the RCM was added to 10 mL of the DI solution at room temperature under stirring at 100 rpm. The DI-loaded RCM was termed RCM-DI. After shaking for 24 h, the supernatant was analyzed using a UV spectrophotometer. To evaluate the load of DI, 10 mg of DI was dissolved in a methanol solution; the concentration of the DI in the solutions was in the range of 4–200  $\mu\text{g mL}^{-1}$ . At specific time intervals, a small portion of the solution was removed and analyzed by UV spectrophotometry at 270 nm. The calibration curve of DI was linear in the concentration range of 4–200  $\mu\text{g mL}^{-1}$ . The regression equation was  $y = 0.01992x + 0.01997$ , and the correlation coefficient was  $R^2 = 0.9995$ . To demonstrate the strategy of loading the insecticide in the DI, a load of DI was analyzed using a standard calibration curve, and the DI loading capacity was calculated using the following formula<sup>1</sup>:

$$LC = \frac{(C_0 - C_t)V}{m_1}$$

where  $LC$  ( $\text{mg g}^{-1}$ ) is the load capacity of DI,  $C_0$  ( $\text{mg L}^{-1}$ ) is the initial concentration of DI,  $C_t$  ( $\text{mg L}^{-1}$ ) is the final concentration of DI,  $V$  (L) is the volume of DI solution,  $m_1$  (g) is the mass of RCM.

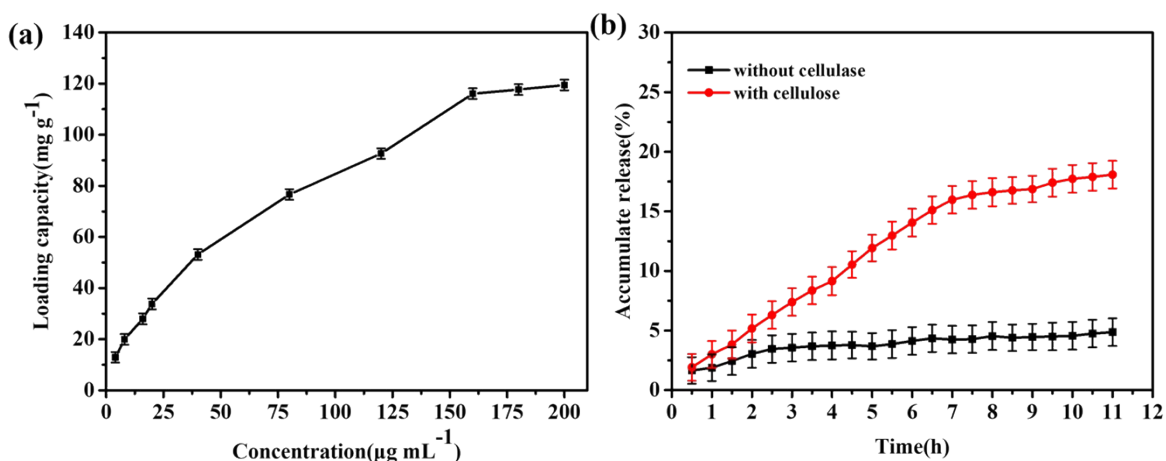

Figure. S5. The dependence of loading capacity on the DI concentration (a), the presence or absence of cellulase on the release behavior of RCM-DI-PEGDA (b).

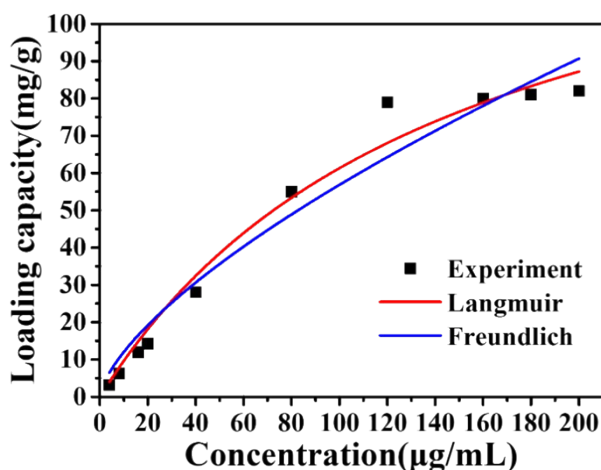

Figure.S6. Fitting of the RCM isotherm by the Langmuir and Freundlich equations.

Table.S2. Model and parameters of isotherms of RCM.

| Sample  | LC (mg g <sup>-1</sup> ) | Langmuir                    |                              |         | Freundlich                  |        |         |
|---------|--------------------------|-----------------------------|------------------------------|---------|-----------------------------|--------|---------|
|         |                          | $q_m$ (mg g <sup>-1</sup> ) | $K_L$ (mL mg <sup>-1</sup> ) | $R_1^2$ | $K_F$ (mg g <sup>-1</sup> ) | 1/n    | $R_2^2$ |
| RCM-AVM | 80.51                    | 151.02                      | 0.0068                       | 0.979   | 2.55                        | 0.6742 | 0.955   |

#### S6 TGA and DTG Curves of Microspheres.

The thermal stability of RCM-AVM and RCM-AVM-PEGDA of cellulose-based microspheres before and after insecticide loading is different from that of RCM, and TGA measurements were performed under N<sub>2</sub> atmosphere to study the thermal behavior. To inspect the thermal stability of RCM-AVM-PEGDA, Figure S5a, b shows the TGA and DTG thermograms of all the samples. The weight loss below 150°C may be due to the volatilization of steam, 4.64% of the total mass was lost<sup>2</sup>. The decomposition of AVM and RCM start at 241°C and 260°C, respectively. In the range of 220~320°C, it may be mainly due to

the decomposition and evaporation of AVM. The main decomposition peak of RCM is at about 260°C-340°C, while the decomposition peak of RCM-AVM-PEGDA is about 300°C. This may be attributed to the weight loss due to the oxidative degradation of cellulose. Weightlessness is 65.13%. The small peak weight loss at about 520°C is the oxidative decomposition peak of residual carbon<sup>3</sup>. These results indicate that RCM-AVM-PEGDA has good thermal stability. In conclusion, PEGDA gel grafting effectively improves the thermal stability of RCM, which shows that the performance of insecticide formulations will not have a significant impact in a long time, and effectively improve the duration of insecticides.

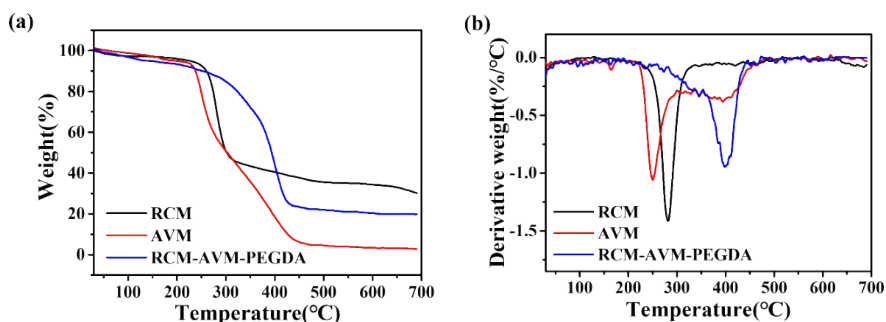

Figure.S7.TGA (a) and DTG (b) curves of RCM, AVM, RCM-AVM and RCM-AVM-PEGDA.

Table.S3. Dissipation Parameters of the AVM, AVM-EC and RCM-AVM-PEGDA microspheres.

| Compound      | UV irradiation |        |              |              |
|---------------|----------------|--------|--------------|--------------|
|               | $k(h^{-1})$    | $R^2$  | $DT_{50}(h)$ | $DT_{90}(h)$ |
| AVM           | 0.3176         | 0.9022 | 2.1825       | 7.2502       |
| AVM-EC        | 0.0703         | 0.9664 | 9.8641       | 32.7677      |
| RCM-AVM-PEGDA | 0.0212         | 0.9998 | 32.7265      | 108.7151     |

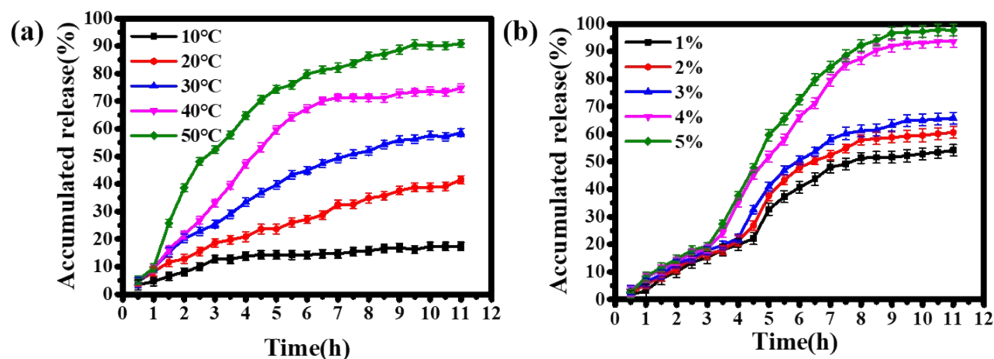

Figure.S8. (a) The release behavior of RCM-AVM-PEGDA at different temperatures (pH 7.0 and cellulase at 3%); (b)The release behavior of RCM-AVM-PEGDA under different cellulase concentrations (pH 7.0 and 37°C).

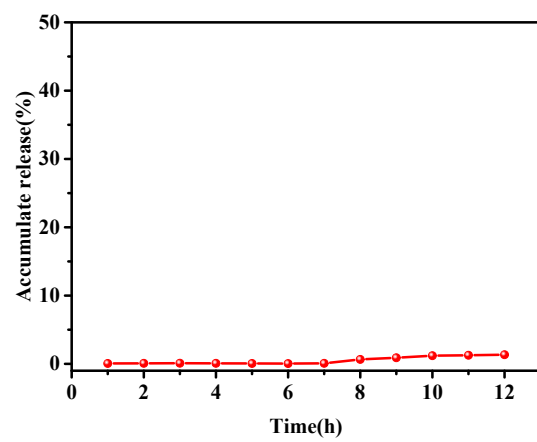

Figure S9. The release behavior of RCM-AVM-PEGDA under stomach conditions (pH 2.5 and 38°C).

Table.S4. Constants from fitting the generalized model,  $M_t/M_\infty = Kt^n$ , to the release data of AVM from RCM-AVM-PEGDA microspheres under different conditions.

| Conditions        |     | n    | K ( $\times 10^{-2}$ ) | R <sup>2</sup> |
|-------------------|-----|------|------------------------|----------------|
| Temperatures (°C) | 10  | 0.41 | 6.79                   | 0.9174         |
|                   | 20  | 0.66 | 8.46                   | 0.9947         |
|                   | 30  | 0.64 | 13.34                  | 0.9786         |
|                   | 40  | 0.63 | 18.54                  | 0.9102         |
|                   | 50  | 0.53 | 28.09                  | 0.9170         |
| Cellulase amount  | 1:1 | 0.96 | 9.56                   | 0.9451         |
|                   | 1:2 | 0.98 | 8.68                   | 0.9509         |
|                   | 1:3 | 0.87 | 8.06                   | 0.9355         |
|                   | 1:4 | 0.86 | 7.52                   | 0.9361         |
|                   | 1:5 | 0.83 | 6.99                   | 0.9437         |

Table.S5.MTT assay demonstrates the cytotoxicity of RCM-AVM-PEGDA microspheres in cell proliferation (\* represents P < 0.05 by comparing with the blank group).

|               | day1      | day3       | day5       |
|---------------|-----------|------------|------------|
| RCM-AVM-PEGDA | 0.30±0.02 | 0.70±0.01* | 1.02±0.08* |
| RCM-AVM       | 0.30±0.01 | 0.64±0.02* | 0.94±0.08* |
| AVM           | 0.29±0.01 | 0.57±0.03* | 0.80±0.04* |
| Blank         | 0.30±0.01 | 0.79±0.01  | 1.12±0.05  |

### S7 Insecticidal activity analysis

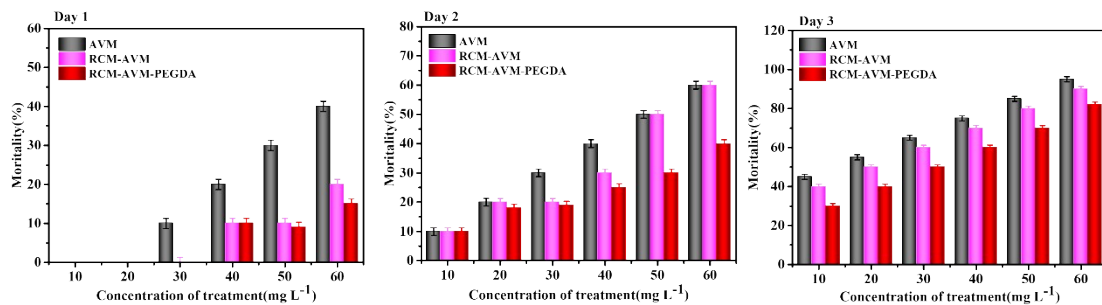

Fig S10. Mortality of different concentrations of AVM, RCM-AVM and RCM-AVM-PEGDA against *mole crickets*

Table S6 Toxicity of AVM, RCM-AVM, and RCM-AVM-PEGDA against *mole crickets*.

| Time after spraying(day) | LC <sub>50</sub> (mg L <sup>-1</sup> ) | LC <sub>90</sub> (mg L <sup>-1</sup> ) | 95% Fiducial limit | Slope (mean± SE) | P           | χ <sup>2</sup> |       |
|--------------------------|----------------------------------------|----------------------------------------|--------------------|------------------|-------------|----------------|-------|
| AVM                      | Day1                                   | 0.669                                  | 1.373              | 0.764-7.437      | 1.702±0.016 | 0.990          | 0.290 |
|                          | Day2                                   | 0.502                                  | 2.199              | 0.520-3.475      | 0.754±0.008 | 0.996          | 0.173 |
|                          | Day3                                   | 0.172                                  | 0.931              | 0.449-3.047      | 0.663±0.008 | 0.929          | 0.867 |

|                 |      |       |        |              |              |       |       |
|-----------------|------|-------|--------|--------------|--------------|-------|-------|
| <b>RCM-AVM</b>  | Day1 | 0.911 | 1.758  | 1.126-10.101 | 2.869±0.117  | 0.961 | 0.620 |
|                 | Day2 | 0.565 | 2.502  | 0.475-3.493  | 0.770±0.010  | 0.877 | 1.208 |
|                 | Day3 | 0.172 | 0.931  | 0.449-3.049  | 0.663±0.008  | 0.929 | 0.867 |
| <b>RCM-AVM-</b> | Day1 | 1.112 | 2.516  | 1.554-8.851  | 2.654±0.169  | 0.948 | 0.729 |
|                 | Day2 | 1.234 | 13.633 | 0.256-2.712  | 0.7570±0.105 | 0.993 | 0.246 |
| <b>PEGDA</b>    | Day3 | 0.248 | 1.385  | 0.424-3.001  | 0.659±0.009  | 0.953 | 0.684 |

### References

- 1.M. Zhao, H. Zhou, L. Hao, H. Chen and X. Zhou, *Carbohydrate Polymers* 2021, **259**, 117749.
2. A.M.A. Nada, M. L. Hassan, *Polymer Degradation and Stability* 1999, **67**, 111-115.
- 3.S. Ouajai and R. A. Shanks, *Polymer Degradation and Stability* 2005, **89**, 327-335.
